# Supplementary material for: Yeast Hrq1 shares structural and functional homology with the disease-linked human RecQ4 helicase
Source: PubMed Central journal article supplement — Nucleic Acids Res. 2017 Feb 25;45(9):5217–30. doi: 10.1093/nar/gkx151 (PMC5605238; doi:10.1093/nar/gkx151), 2017-02-25
Supplement: gkx151_Supp.pdf [file gkx151_Supp.pdf]

## Supplemental Materials

### SUPPLEMENTAL FIGURES AND LEGENDS

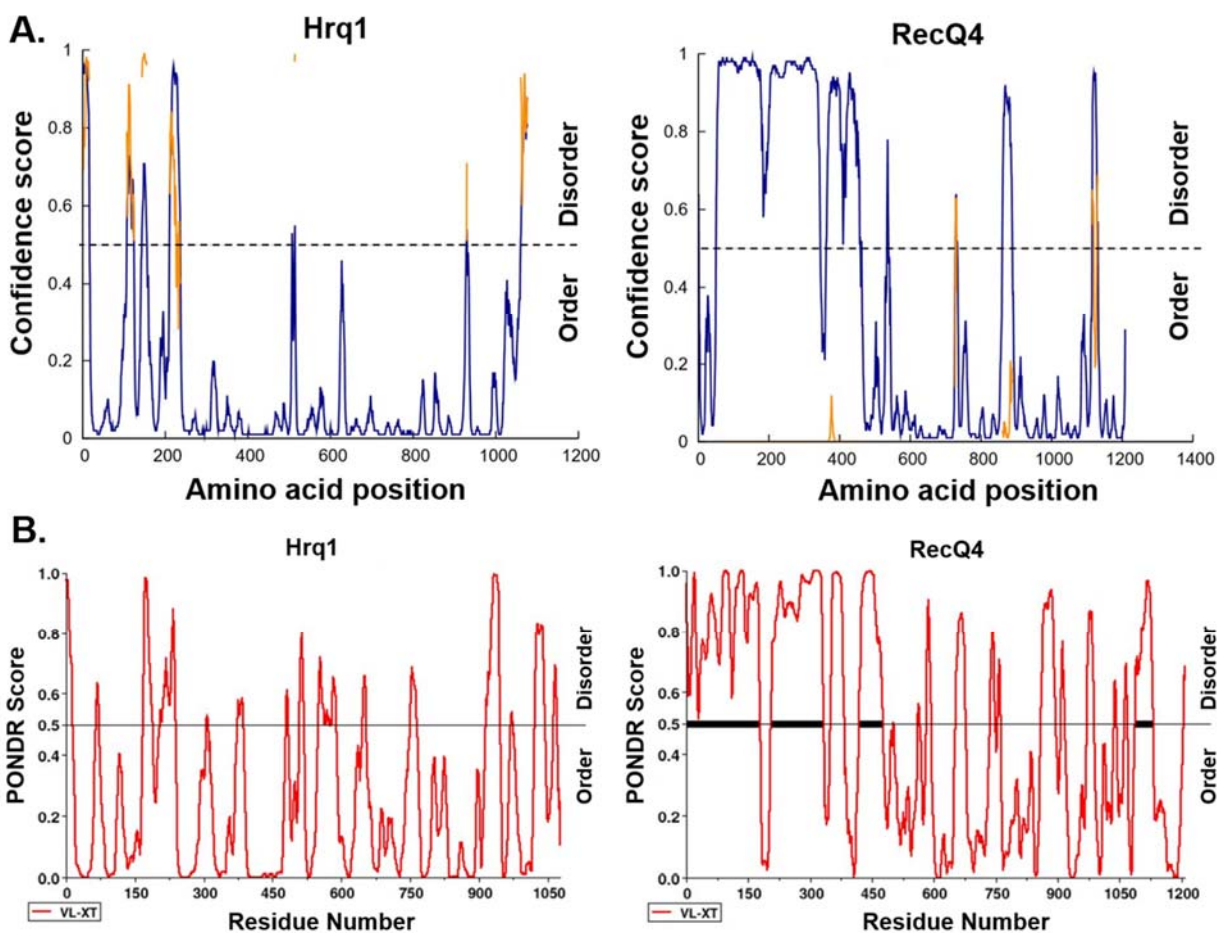

**Supplemental Figure 1. Disorder prediction for Hrq1 and RecQ4.** A) DISOPRED3 analysis from the UCL Department of Computer Science web server (<http://bioinf.cs.ucl.ac.uk/psipred/?disopred=1>) was performed on Hrq1 (left) and RecQ4 (right) to predict intrinsically disordered regions. A confidence score above the dashed line represents likely unstructured regions. Both helicases are predicted to contain disordered regions in the N-terminus, with RecQ4 likely having very few structured regions within the first ~500 residues. B) Predictor of Naturally Disordered Regions (PONDNR) plots for Hrq1 (left) and RecQ4 (right). Protein sequences were analysed using the VL-XT algorithm with default settings (<http://www.pondr.com/>). PONDNR scores > 0.5 represent potentially disordered regions. Analysis again demonstrates that Hrq1 and RecQ4 likely have disordered N-termini, with the amount of predicted disorder greater for RecQ4.

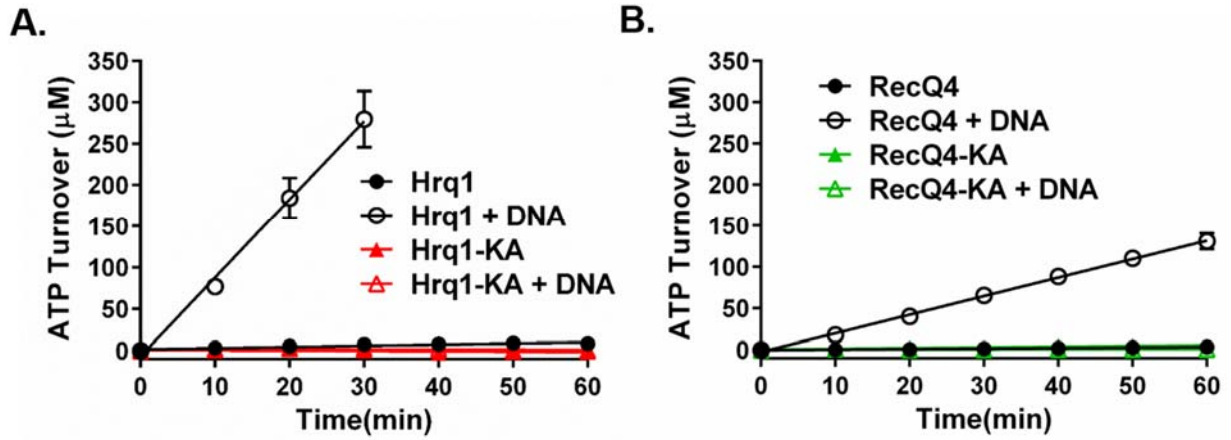

**Supplemental Figure 2. Analysis of catalytically inactive Hrq1-K318A and RecQ4-K508A mutant proteins demonstrates that the observed ATPase activities of the wild type proteins are not due to contaminating enzymes from insect cell culture. A) and B) Hrq1-K318A and RecQ4-K508A are ATPase-dead. The rate of ATP hydrolysis by Hrq1-K318A and RecQ4-K508A was not significantly above background in the presence or absence of poly(dT) ssDNA.**

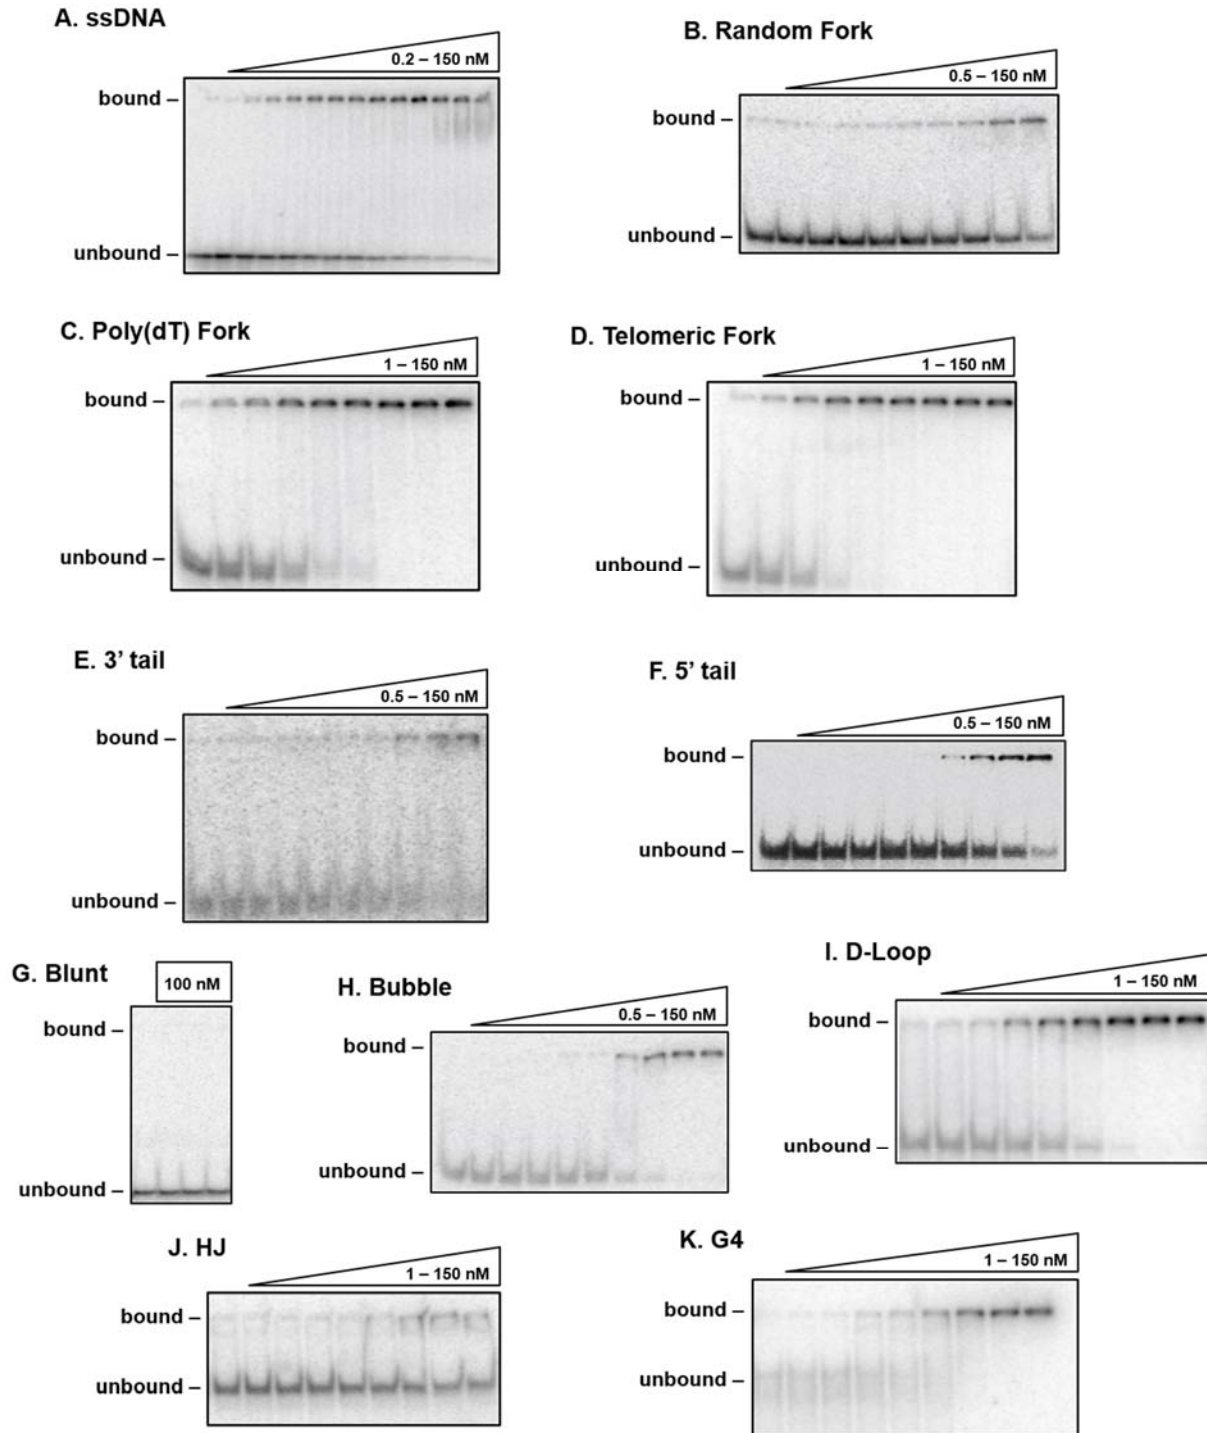

**Supplemental Figure 3. Representative gel images of Hrq1 binding to each substrate tested.** The first lane in each gel is a no protein control. The concentration ranges indicated do not necessarily reflect the values used for the plotted binding curves in the main text.

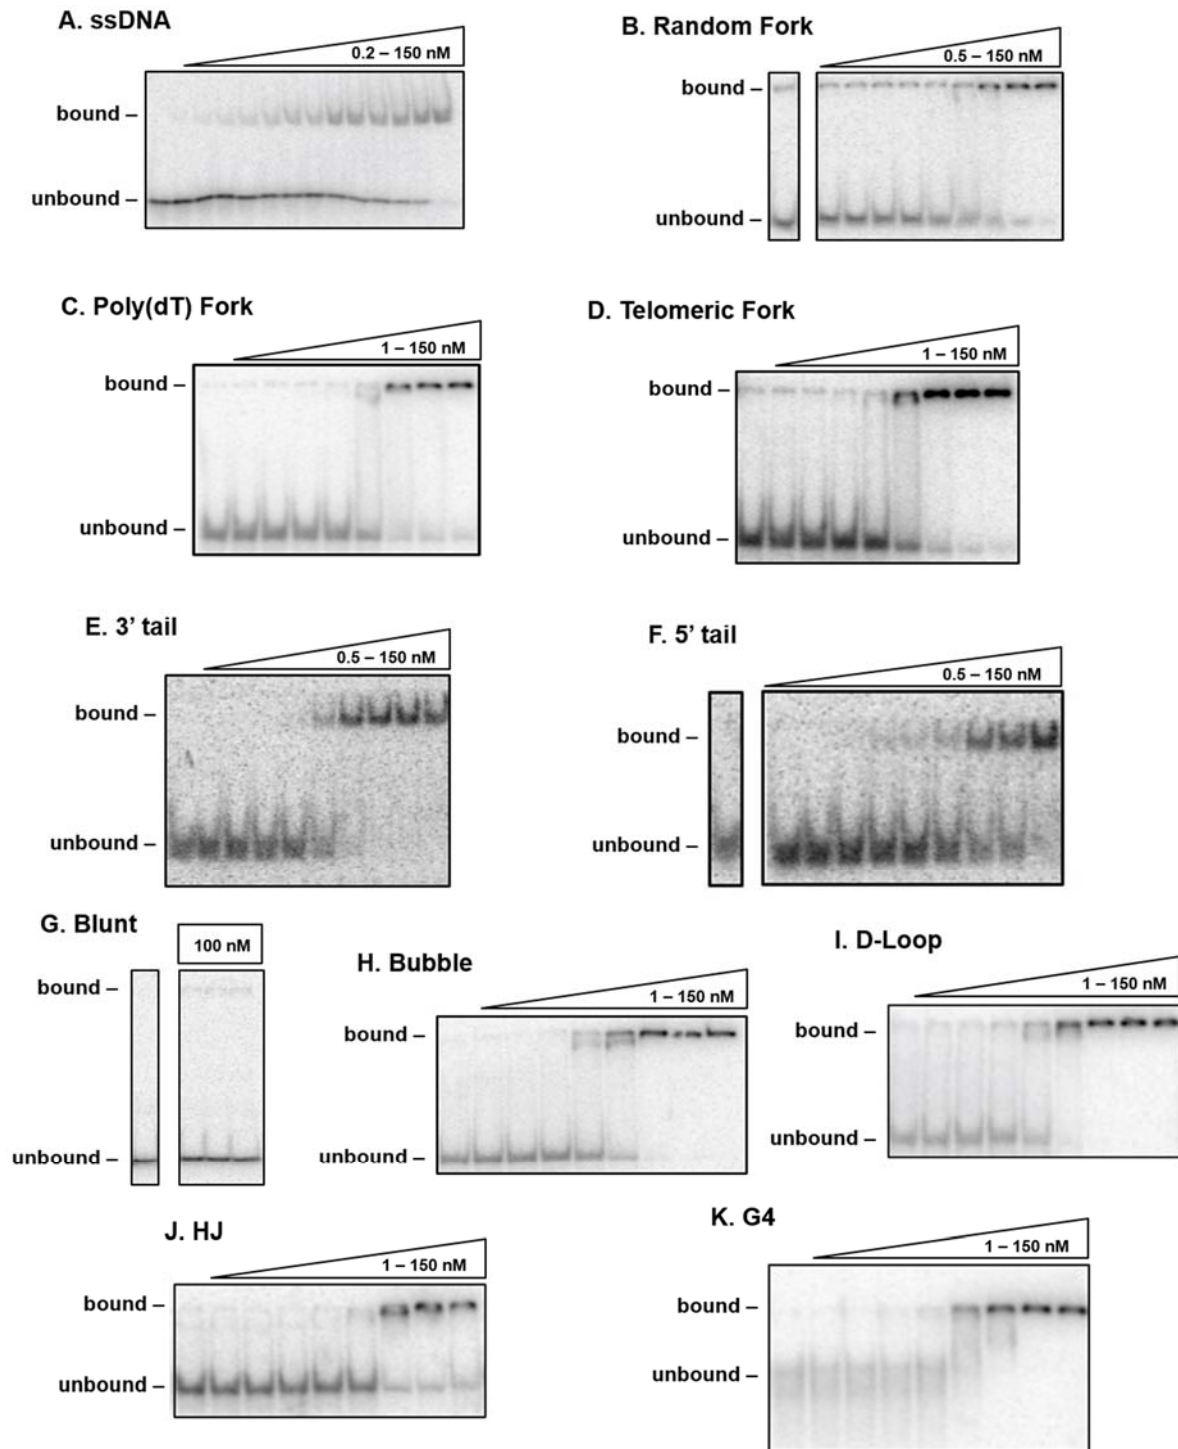

**Supplemental Figure 4. Representative gel images of RecQ4 binding to each substrate tested. The first lane in each gel is a no protein control. The concentration ranges indicated do not necessarily reflect the values used for the plotted binding curves in the main text.**

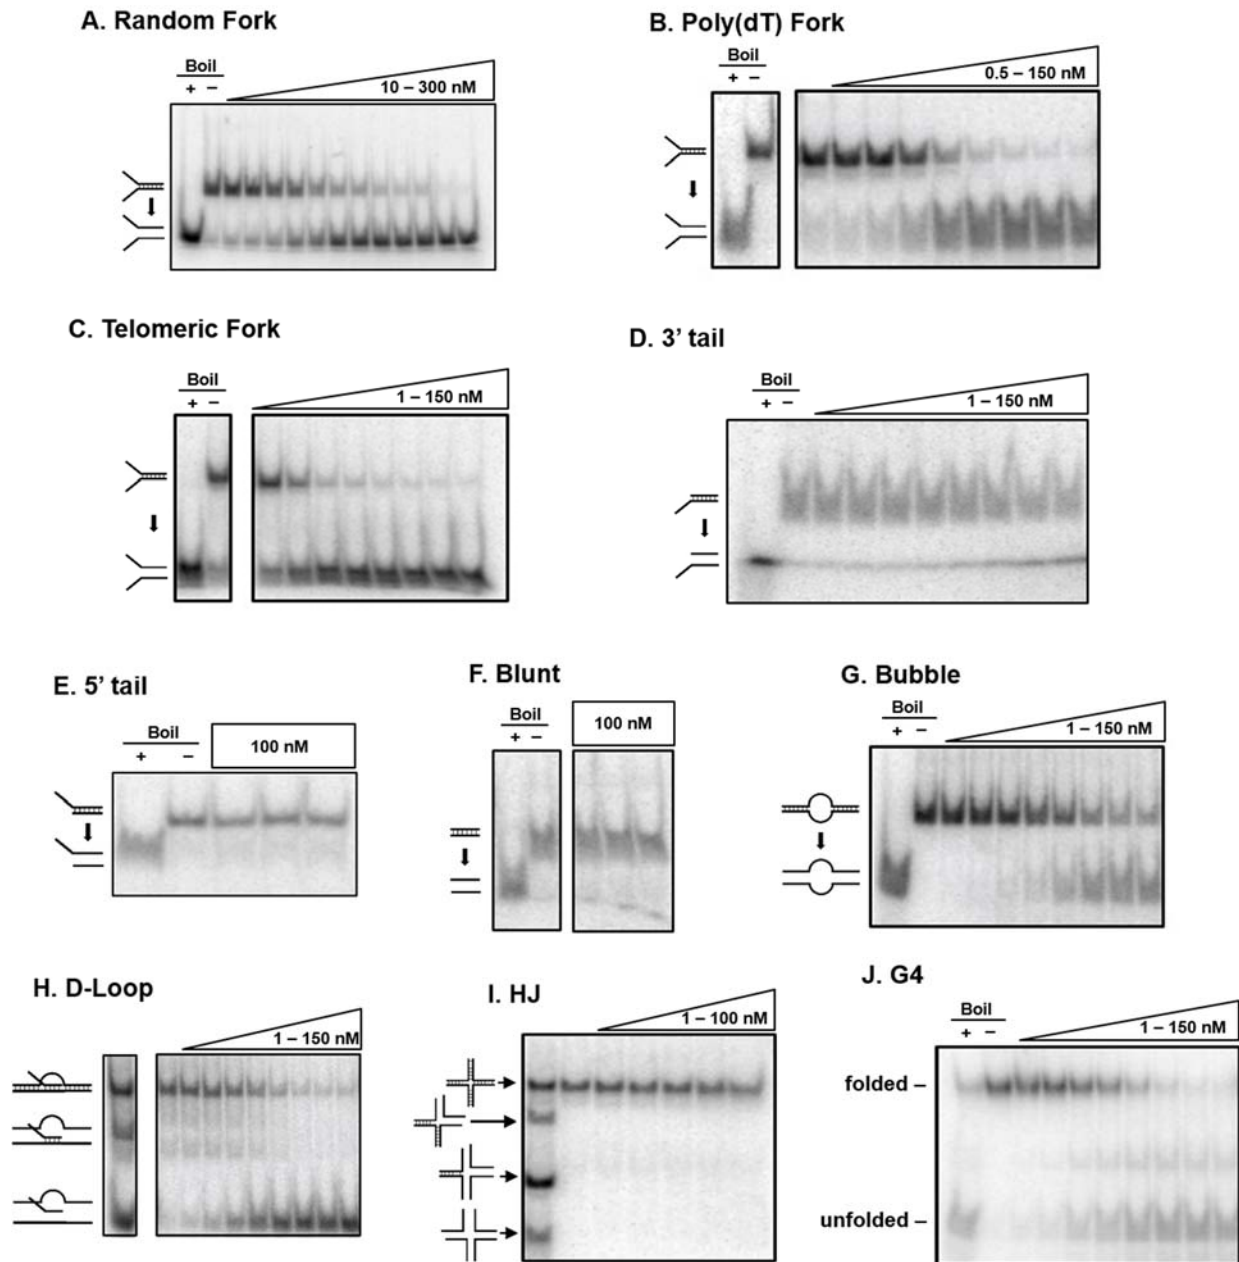

**Supplemental Figure 5. Representative gel images of Hrq1 helicase assays.** The indicated boiled and unboiled lanes were used as a reference for unwound product and as a no protein control, respectively. For substrates containing >2 oligonucleotides (HJ and D-Loop), lane 1 instead contains full-length, intermediate, and fully unwound products for reference. The no protein control is in lane 2 of these gels.

### A. Random Fork

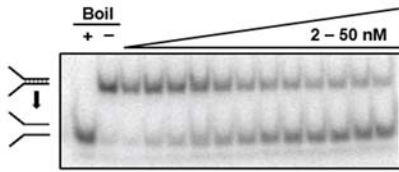

### B. Poly(dT) Fork

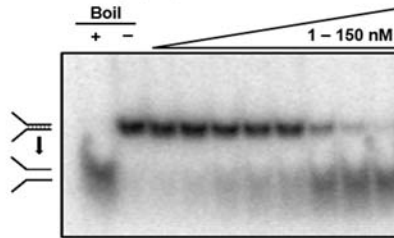

### C. Telomeric Fork

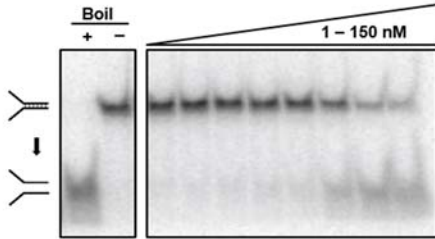

### D. 3' tail

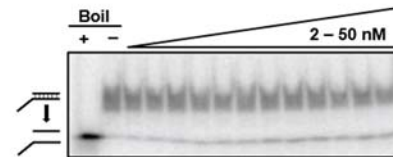

### E. 5' tail

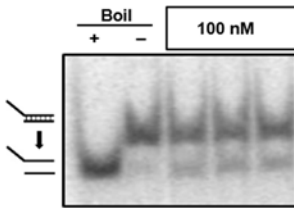

### F. Blunt

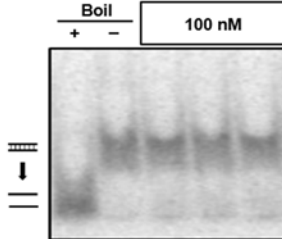

### G. Bubble

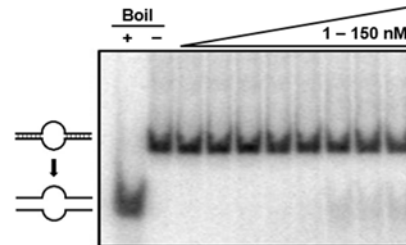

### H. D-Loop

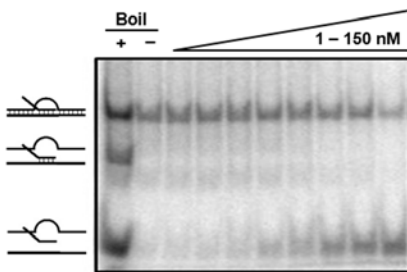

### I. HJ

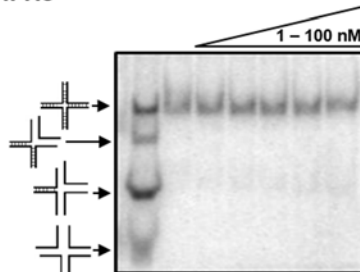

### J. G4

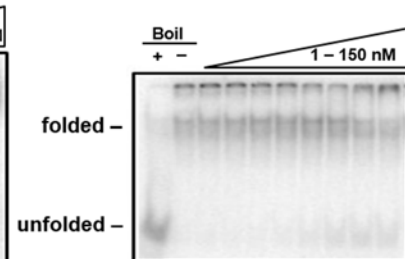

**Supplemental Figure 6. Representative gel images of RecQ4 helicase assays.** The indicated boiled and unboiled lanes were used as a reference for unwound product and as a no protein control, respectively. For substrates containing >2 oligonucleotides (HJ and D-Loop), lane 1 instead contains full-length, intermediate, and fully unwound products for reference. The no protein control is in lane 2 of these gels.

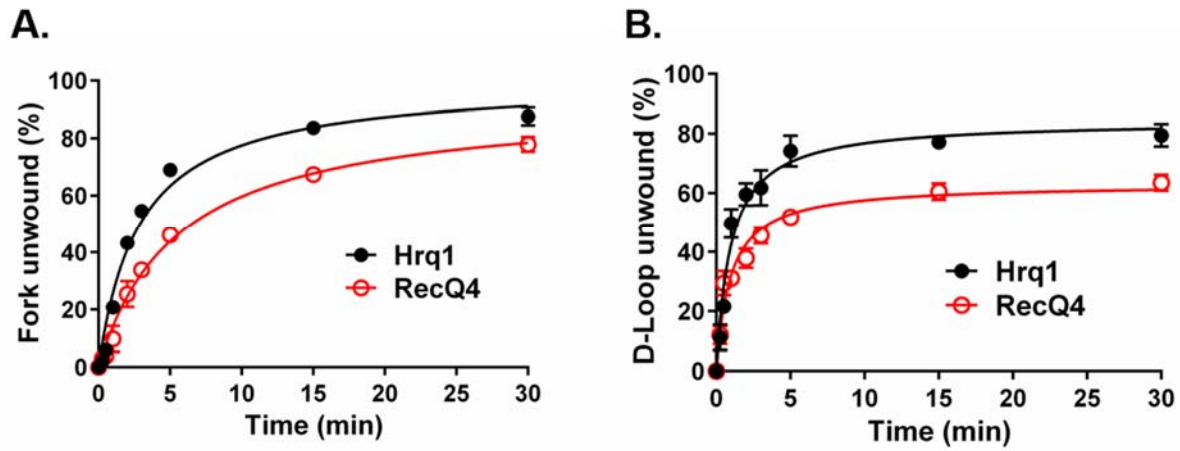

**Supplemental Figure 7. Hrql (black) and RecQ4 (red) helicase activity as a function of time for the fork (A) and D-loop (B) substrates.** At a concentration of 100 nM, both helicases display similar unwinding kinetics on the individual substrates, with the fastest unwinding for the D-loop.

RecQ1

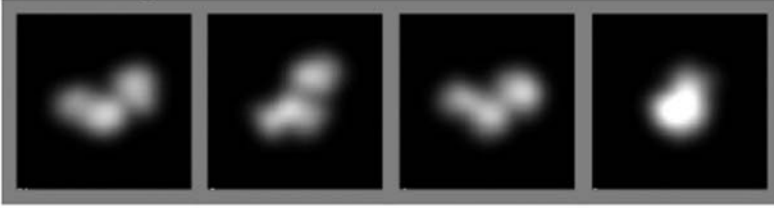

Hrq1

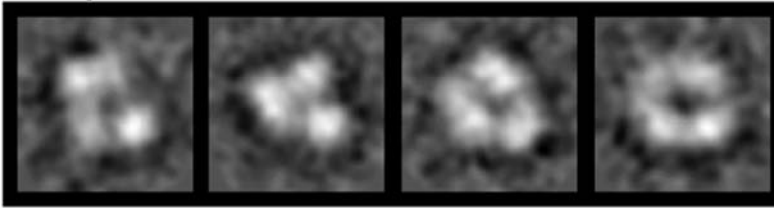

RecQ4

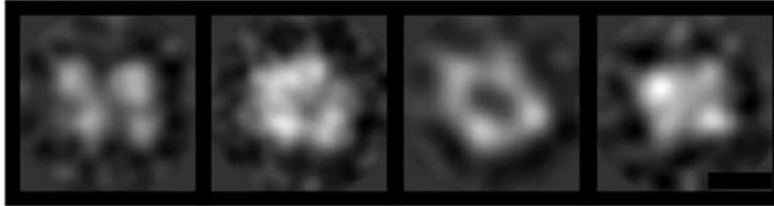

**Supplemental Figure 8. Projections of RecQ1 and structural comparisons.** (Upper panel) A gallery of model projection images of RecQ1 low-pass filtered to 30 Å (PDB 2V1X). (Lower panel) Enlarged views of selected projection images of RecQ1, selected 2D class averages of Hrq1, and selected 2D class averages of RecQ4. Scale bar, 5 nm. The crystal structure of RecQ1 used here has 591 residues, which is approximately half the size of Hrq1 and RecQ4 (13,69).



**A.**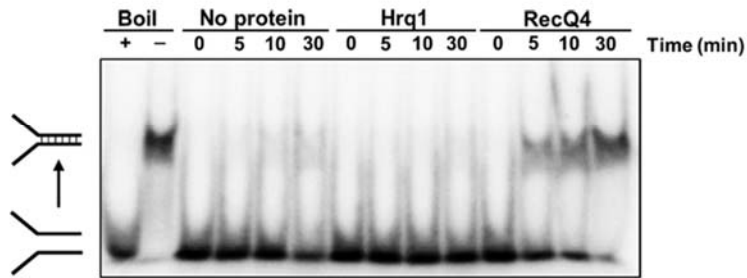**B.**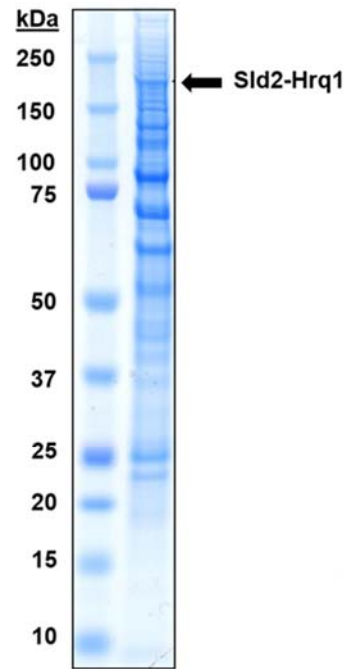

**Supplemental Figure 9. Hrq1 does not anneal DNA under a variety of conditions.** A) Annealing assays were performed with 100 nM Hrq1 or RecQ4 for up to 30 min at 37°C. Hrq1 was unable to anneal DNA above background levels. B) Partial purification of 10xHis-Sld2-Hrq1 by Ni-affinity chromatography. The fusion protein is marked with an arrow.

**SUPPLEMENTAL TABLES**

**Supplemental Table 1.** Names and sequences of the oligonucleotides used to generate all of the substrates used in the biochemical assays.

| Name  | Sequence                                                      | Substrate                     | Ref. |
|-------|---------------------------------------------------------------|-------------------------------|------|
| MB547 | GACGTCATAGACGATTACATTGCTAGGACATGCTGTCTAGAGACTATCGC            | Random (ATPase)               | (1)  |
| MB548 | AAAAAAAAAAAAAAAAAAAAAAAAAAAAAAAAAAAAAAAAAAAAAAAAAAAA          | Poly(dA) (ATPase)             | -    |
| MB549 | CCCCCCCCCCCCCCCCCCCCCCCCCCCCCTCCCCCCCCCCCCCCCCCCC             | Poly(dC) (ATPase)             | -    |
| MB550 | GGGGGGGGGGGGGGGGGGGGGAGGGGGGGGGGGGGGGGGGGGGGAGGGGGGGG         | Poly(dG) (ATPase)             | -    |
| MB551 | TTTTTTTTTTTTTTTTTTTTTTTTTTTTTTTTTTTTTTTTTTTTTTTTTTT           | Poly(dT) (ATPase)             | -    |
| MB583 | GACGCTGCCGAATTCTGGCTTGTAGGACATCTTTGCCACGTTGACCC               | HJ                            | -    |
| MB584 | TGGGTCAACGTGGGCAAAGATGTCCTAGCAATGTAATCGTCTATGACGTT            | HJ                            | -    |
| MB585 | CAACGTCATAGACGATTACATTGCTAGGACATGCTGTCTAGAGACTATCGA           | HJ                            | -    |
| MB586 | ATCGATAGTCTCTAGACAGCATGTCCTAGCAAGCCAGAATTCGGCAGCGT            | HJ                            | -    |
| MB733 | ACCGTTGTGCAACTGAGTGGACAACGTGTCACTCACATAGCGTTC                 | 25-nt Random Fork,<br>5'-tail | -    |
| MB734 | GAACGCTATGTGAGTGACACCAACAGGTGAGTCAACGTGTTGCCA                 | 25-nt Random Fork,<br>3'tail  | -    |
| MB808 | GGTGAACCTGCAGGTGGGCGGCTGCTCATCGTAGGTTAGTTGGTAGAATTCGGCAGCGTC  | Bubble                        | (2)  |
| MB811 | GACGCTGCCGAATTCTAGGTTGATTGGATGCTACTCGTCGGCGCCACCTGCAGGTTCCACC | Bubble                        | (2)  |
| MB819 | AAAGGGGGAGCTGGGGTAGATGGGAATGTGAGGGCAACAGGTGAGTCAACGTGTTGCCA   | G4                            | (3)  |
| MB820 | GAACGCTATGTGAGTGACAC                                          | 5'-tail, Blunt                | -    |
| MB821 | GTGCTCACTCACATAGCGTTC                                         | 3'-tail, Blunt                | -    |

|        |                                                                                                   |                                          |     |
|--------|---------------------------------------------------------------------------------------------------|------------------------------------------|-----|
| MB1057 | CTA CTC TAA CTC CGA CCG CTT GCA TGC CTG CAG G                                                     | Strand Annealing/Exchange Fork           | (4) |
| MB1058 | CCT GCA GGC ATG CAA GCG GTC GGA GTT AGA GTA G                                                     | Strand Exchange Blunt                    | (4) |
| MB1059 | ATC CTC TCT AGA GTC AAG GTC GGA GTT AGA GTA G                                                     | Strand Annealing/Exchange Fork           | (4) |
| MB1113 | ACCGTTGTGCAACTGAGTGGACAACACCGTTGTGCAACTGAGTGGACAACGTGTCACTCACATAGCGTTC                            | 50-nt Random Fork                        | -   |
| MB1114 | GAACGCTATGTGAGTGACACCAACAGGTGAGTCAACGTGTTGCCACAACAGGTGAGTCAACGTGTTGCCA                            | 50-nt Random Fork                        | -   |
| MB1115 | ACCGTTGTGCAACTGAGTGGACAACACCGTTGTGCAACTGAGTGGACAACACCGTTGTGCAACTGAGTGGACAACGTGTCACTCACATAGCGTTC   | 75-nt Random Fork                        | -   |
| MB1116 | GAACGCTATGTGAGTGACACCAACAGGTGAGTCAACGTGTTGCCACAACAGGTGAGTCAACGTGTTGCCACAACAAGTGTGAGTCAACGTGTTGCCA | 75-nt Random Fork                        | -   |
| MB1117 | GTG TGG GTG TGG TGT GGG TGT GGT GTG GGT GTG TGG GTG TGG TGT GGG TG                                | Yeast telomeric repeat G-strand (ATPase) | -   |
| MB1118 | CAC CCA CAC CAC ACC CAC ACA CCC ACA CCA CAC CCA CAC CAC ACC CAC AC                                | Yeast telomeric repeat C-strand (ATPase) | -   |
| MB1119 | TTT AGG GTT TAG GGT TTA GGG TTT AGG GTT TAG GGT TTA GGG TTT AGG GTT TAG GG                        | Human telomeric repeat G-strand (ATPase) | -   |
| MB1120 | CCC TAA ACC CTA AAC CCT AAA CCC TAA ACC CTA AAC CCT AAA CCC TAA ACC CTA AA                        | Human telomeric repeat C-strand (ATPase) | -   |

|        |                                                              |                               |     |
|--------|--------------------------------------------------------------|-------------------------------|-----|
| MB1162 | GGGTGAACCTGCAGGTGGGCGGCTGCTCATCGTAGGTTAGTGGTAGAATTCGGCAGCGTC | D-Loop                        | (5) |
| MB1163 | GACGCTGCCGAATTCTACCATGCCTTGCTAGGACATCTTTGCCACCTGCAGGTTACCC   | D-Loop                        | (5) |
| MB1165 | TAAGAGCAAGATGTTCTATAAAAGATGTCCTAGCAAGGCA                     | D-Loop                        | (5) |
| MB1167 | TTTTTTTTTTTTTTTTTTTTTTTTTTTTGTGTCACACTACATAGCGTTC            | Poly(dT) Fork                 | -   |
| MB1168 | GAACGCTATGTGAGTGACACTTTTTTTTTTTTTTTTTTTTTTTTT                | Poly(dT) Fork                 | -   |
| MB1169 | GGTGTGGTGTGGGTGTGGTGTGGGTGTGTCACACTACATAGCGTTC               | Poly(TG <sub>1-3</sub> ) Fork | -   |
| MB1170 | GAACGCTATGTGAGTGACACTGGGTGTGGTGTGGGTGTGGTGTGG                | Poly(TG <sub>1-3</sub> ) Fork | -   |
| MB1171 | TTAGGGTTAGGGTTAGGGTTAGGGTGTGTCACACTACATAGCGTTC               | Poly(TTAGGG) Fork             | -   |
| MB1172 | GAACGCTATGTGAGTGACACTTAGGGTTAGGGTTAGGGTTAGGGT                | Poly(TTAGGG) Fork             | -   |
| MB1185 | GGT GAA CCT GCA GGT GG                                       | Bubble Trap                   | -   |
| MB1186 | TAG AAT TCG GCA GCG TC                                       | Bubble Trap                   | -   |

**Supplemental Table 2.** Full peptide sequence list observed by mass spectrometry analysis of the recombinant Hrq1 and RecQ4 preparations.

| Hrq1    |                         |          | RecQ4   |                           |          |
|---------|-------------------------|----------|---------|---------------------------|----------|
| Protein | Peptide                 | E value  | Protein | Peptide                   | E value  |
| Hrq1    | IEECPCSDGCPDCVAASFCK    | 1.90E-09 | RecQ4   | YPPQEAQQLSHQAAPGPR        | 2.60E-10 |
| Hrq1    | DMFGINEVTLIHEDGSPTGAK   | 1.70E-08 | RecQ4   | SPGDLTAEKDKQICDFLYGR      | 6.90E-09 |
| Hrq1    | VETVIPVSEHVNFSDDFK      | 2.60E-08 | RecQ4   | VVVATVAFGMGLDRPDVR        | 7.00E-08 |
| Hrq1    | TSFTLYDGGIFIHQGYPLVK    | 3.50E-08 | RecQ4   | RPSQDDVEAAPEETR           | 7.80E-08 |
| Hrq1    | IIDAIETHNPPVIINSK       | 5.60E-08 | RecQ4   | AVLHLGLPPSFESYVQAVGR      | 7.90E-08 |
| Hrq1    | QLNVAGAIHGAQHAIMGMLPR   | 6.50E-08 | RecQ4   | AGKAEGTAPLHIFPR           | 1.80E-07 |
| Hrq1    | RIEEPCSDGCPDCVAASFCK    | 8.00E-08 | RecQ4   | YFEEEEGQEPGGMEDAQGPEPGQAR | 1.90E-07 |
| Hrq1    | NIFIETGREDLVTEVMSYR     | 1.30E-07 | RecQ4   | LNCPPGPAQLQALHR           | 2.50E-07 |
| Hrq1    | STQLLIFEFDGTMQR         | 1.70E-07 | RecQ4   | ANLKGTLQAGPALGR           | 5.40E-07 |
| Hrq1    | NAVVDTYDGDTEPEER        | 1.90E-07 | RecQ4   | IFHGIGSPCYPAQVYQDR        | 6.70E-07 |
| Hrq1    | VDVDWVTNQRDFTDVDPQEILIR | 2.30E-07 | RecQ4   | DGQPAHCHLFLQPQGEDLR       | 8.10E-07 |
| Hrq1    | QLNVAGAIHGAQHAIMGMLPR   | 2.50E-07 | RecQ4   | TFQAFHSVAFSPCGPCLEQQDEER  | 1.10E-06 |
| Hrq1    | GGEEDQFAVVDITNGR        | 3.40E-07 | RecQ4   | APKTTAEAYHAGMCSR          | 1.10E-06 |
| Hrq1    | FIVAGVDEIQTECKAPEK      | 3.50E-07 | RecQ4   | FQNLDSIIICNR              | 1.30E-06 |
| Hrq1    | DMFGINEVTLIHEDGSPTGAK   | 4.70E-07 | RecQ4   | RGTGVLVEFSELAFLHR         | 1.30E-06 |
| Hrq1    | AFEHIDDIIESSLR          | 5.10E-07 | RecQ4   | ILSGISTLLVLPTGAGK         | 1.30E-06 |
| Hrq1    | ERDYEDPIEAMMK           | 5.20E-07 | RecQ4   | SLCYQLPALLYSR             | 2.80E-06 |
| Hrq1    | ANLDPFSELTNLAQK         | 5.70E-07 | RecQ4   | RTFQAFHSVAFSPCGPCLEQQDEER | 3.40E-06 |
| Hrq1    | HLVVWNPPILPQHER         | 6.00E-07 | RecQ4   | GTGVLVEFSELAFLHR          | 4.80E-06 |
| Hrq1    | FIVAGVDEIQTECK          | 1.00E-06 | RecQ4   | SSESLPAAAEAEPEPR          | 5.10E-06 |
| Hrq1    | TVTKEDLAMVMALMPR        | 1.50E-06 | RecQ4   | TTAEAYHAGMCSR             | 6.50E-06 |
| Hrq1    | TVTKEDLAMVMALMPR        | 2.40E-06 | RecQ4   | VSDEPPQLPEPQPRPGR         | 8.10E-06 |
| Hrq1    | QLNVAGAIHGAQHAIMGMLPR   | 3.90E-06 | RecQ4   | VGSPQPSSSGGEKR            | 1.70E-05 |
| Hrq1    | QLNVAGAIHGAQHAIMGMLPR   | 4.50E-06 | RecQ4   | YFEEEEGQEPGGMEDAQGPEPGQAR | 2.10E-05 |
| Hrq1    | YIDENQIYTETK            | 8.50E-06 | RecQ4   | LQHLQASLSQR               | 2.60E-05 |
| Hrq1    | ENDIFELKDVDDQNQTQK      | 9.40E-06 | RecQ4   | CHSEVPDFLGAPK             | 2.80E-05 |
| Hrq1    | VQRVDVDWVTNQR           | 9.40E-06 | RecQ4   | ALCQLQWDHEPR              | 3.30E-05 |

|      |                            |          |       |                            |          |
|------|----------------------------|----------|-------|----------------------------|----------|
| Hrq1 | EKANLDPFSELTNLAQK          | 9.40E-06 | RecQ4 | MGVHCFGLTATATR             | 4.80E-05 |
| Hrq1 | ILVQLILNNVR                | 1.10E-05 | RecQ4 | GRRPSQDDVEAAPEETR          | 5.40E-05 |
| Hrq1 | TTIIVFGFFK                 | 1.60E-05 | RecQ4 | TCLHAAWVPGSGGR             | 6.20E-05 |
| Hrq1 | ERDYEDPIEAMMK              | 1.90E-05 | RecQ4 | ASTPKPPGTGPVPSFAEK         | 6.60E-05 |
| Hrq1 | TLCGPIETALKR               | 2.00E-05 | RecQ4 | GECFGGGGATVTTK             | 7.00E-05 |
| Hrq1 | DFTDVPQEIILIR              | 2.00E-05 | RecQ4 | HVHADSTDFLAVKR             | 7.60E-05 |
| Hrq1 | LHHNQDGYHASNR              | 2.50E-05 | RecQ4 | HVHADSTDFLAVK              | 7.60E-05 |
| Hrq1 | DPESTFMYIFPTK              | 3.10E-05 | RecQ4 | SRQGSVPDYGQR               | 8.40E-05 |
| Hrq1 | NSDVPVYFGK                 | 4.80E-05 | RecQ4 | KGECFGGGGATVTTK            | 9.00E-05 |
| Hrq1 | IPELKNAVVDTYDGDTEPEER      | 5.60E-05 | RecQ4 | AEGTAPLHIFPR               | 1.30E-04 |
| Hrq1 | TVTKEDLAMVMALMPR           | 5.70E-05 | RecQ4 | TTGQAGGGLRSSESLPAAAEAEPEPR | 1.40E-04 |
| Hrq1 | LNTLYTFLICR                | 6.00E-05 | RecQ4 | QGSVPDYGQR                 | 1.40E-04 |
| Hrq1 | SWSASDRFSQIK               | 6.90E-05 | RecQ4 | RPSQDDVEAAPEETR            | 1.70E-04 |
| Hrq1 | NIIIEIEASR                 | 7.20E-05 | RecQ4 | LGSLDPGWLQR                | 1.90E-04 |
| Hrq1 | QYFTESHLR                  | 7.90E-05 | RecQ4 | DGQPAHCHLFLQPQGEDLREL      | 2.10E-04 |
| Hrq1 | IPTYTTEEMKK                | 9.00E-05 | RecQ4 | TTAEAYHAGMCSR              | 2.30E-04 |
| Hrq1 | STEFYASQIK                 | 9.10E-05 | RecQ4 | AATKSPQPTPGR               | 2.40E-04 |
| Hrq1 | QESNEMSIPNYSNNSVITTIPQMIEK | 1.10E-04 | RecQ4 | GRRPSQDDVEAAPEETR          | 2.40E-04 |
| Hrq1 | IFDFNNGGFQQK               | 1.10E-04 | RecQ4 | AACIHSGMTR                 | 2.50E-04 |
| Hrq1 | YGSGLCVK                   | 1.10E-04 | RecQ4 | LVDSMGWELASVR              | 2.60E-04 |
| Hrq1 | DKQYFTESHLR                | 1.10E-04 | RecQ4 | TTGQAGGGLRSSESLPAAAEAEPEPR | 2.60E-04 |
| Hrq1 | QYFTESHLR                  | 1.90E-04 | RecQ4 | AVMRILSGISTLLVLPTGAGK      | 2.90E-04 |
| Hrq1 | KQLNVAGAIHGAQHAIMGMLPR     | 2.10E-04 | RecQ4 | QFLSLRPEEKFSR              | 3.30E-04 |
| Hrq1 | LKSTEFYASQIK               | 2.20E-04 | RecQ4 | AGRDGQPAHCHLFLQPQGEDLR     | 3.60E-04 |
| Hrq1 | IPTYTTEEMKK                | 2.90E-04 | RecQ4 | SPGDLTAEK                  | 3.80E-04 |
| Hrq1 | APEKEFAER                  | 2.90E-04 | RecQ4 | YPPQEAELSHQAAPGPRR         | 4.30E-04 |
| Hrq1 | IFDFNNGGFQQKENDIFELK       | 3.30E-04 | RecQ4 | AATKSPQPTPGR               | 6.20E-04 |
| Hrq1 | VETVIPVSEHVNFSDDFKIIDVR    | 3.60E-04 | RecQ4 | IFHGIGSPCYPAQVYGQDRR       | 7.80E-04 |
| Hrq1 | STQLLIFEFIDGTMQR           | 3.90E-04 | RecQ4 | VVVATVAFGMGLDRPDVR         | 0.0022   |
| Hrq1 | AFEHIDDIIESSLRR            | 5.60E-04 | RecQ4 | GTLQAGPALGR                | 0.0024   |

|                                     |                        |          |                   |                            |        |
|-------------------------------------|------------------------|----------|-------------------|----------------------------|--------|
| Hrq1                                | DDTHTNEIHK             | 6.10E-04 | RecQ4             | SPCLTLVVSPLLSLMDDQVSGLPCLK | 0.003  |
| Hrq1                                | LCHCFYENSGLQFISCSATLK  | 7.40E-04 | RecQ4             | MGVHCFLGLTATATRR           | 0.0031 |
| Hrq1                                | YALEICQKK              | 7.90E-04 | RecQ4             | VGSPQPSSSGGEK              | 0.0032 |
| Hrq1                                | DYEDPIEAMMK            | 0.0011   | RecQ4             | YHGLSPSSQAR                | 0.0032 |
| Hrq1                                | IPTYTTEEMK             | 0.0011   | RecQ4             | AACIHSGMTR                 | 0.0034 |
| Hrq1                                | TLCGPIETALK            | 0.0013   | RecQ4             | YHGLSPSSQAR                | 0.0045 |
| Hrq1                                | VIFTNPDMIHTSILPNHANWR  | 0.0016   | RecQ4             | QFLSLRPEEK                 | 0.0053 |
| Hrq1                                | GGKYGSGLCVK            | 0.002    | RecQ4             | SLCYQLPALLYSRR             | 0.0056 |
| Hrq1                                | VDVDWVTNQR             | 0.0025   | RecQ4             | LQDWEDQVR                  | 0.0057 |
| Hrq1                                | DYEDPIEAMMK            | 0.0028   | RecQ4             | AFMQGQLR                   | 0.0063 |
| Hrq1                                | ERDYEDPIEAMMK          | 0.003    | RecQ4             | MGVHCFLGLTATATRR           | 0.0063 |
| Hrq1                                | YALEICQK               | 0.0033   | RecQ4             | LQDWEDQVRC DIR             | 0.0068 |
| Hrq1                                | ATKDDTHTNEIK           | 0.0034   | RecQ4             | LVDSMGWELASVRR             | 0.0071 |
| Hrq1                                | HCFTIPSR               | 0.0041   | RecQ4             | ASSKASTPKPPGTGPVPSFAEK     | 0.0078 |
| Hrq1                                | HVVPTFK                | 0.0059   | RecQ4             | RALCQLQWDHEPR              | 0.01   |
| Hrq1                                | EMFHGNLK               | 0.0067   | RecQ4             | AFMQGQLR                   | 0.013  |
| Hrq1                                | DGPEPNMPEIK            | 0.0067   | RecQ4             | ESVLQKIR                   | 0.013  |
| Hrq1                                | SWSASDRFSQIK           | 0.0078   | RecQ4             | DTDQALLTLLQ GK             | 0.023  |
| Hrq1                                | KQLNVAGAIHGAQHAIMGMLPR | 0.0081   | RecQ4             | AACIHSGMTRK                | 0.024  |
| Hrq1                                | DPESTFMYIFPTK          | 0.013    | RecQ4             | QFLSLRPEEK                 | 0.038  |
| Hrq1                                | RIIDAIETHNPPVIINSK     | 0.013    | RecQ4             | EDTERIAALLR                | 0.039  |
| Hrq1                                | NFEQFFFF               | 0.016    | CG6833, isoform A | LQASMER                    | 0.0081 |
| Hrq1                                | KHVVPFK                | 0.02     |                   |                            |        |
| Hrq1                                | DDTHTNEIHK             | 0.02     |                   |                            |        |
| Hrq1                                | LREFILEK               | 0.021    |                   |                            |        |
| Hrq1                                | SAGQGS GKTDAFR         | 0.022    |                   |                            |        |
| Hrq1                                | LIFYDSK                | 0.028    |                   |                            |        |
| Hrq1                                | DYEDPIEAMMK            | 0.03     |                   |                            |        |
| Hrq1                                | ENDIFELK               | 0.047    |                   |                            |        |
| Heat shock 70 kDa protein cognate 4 | IINEPTAAAIAYGLDK       | 1.40E-06 |                   |                            |        |

|                                     |                        |          |  |  |  |
|-------------------------------------|------------------------|----------|--|--|--|
| Heat shock 70 kDa protein cognate 4 | STAGDTHLGGEDFDNR       | 6.30E-06 |  |  |  |
| Heat shock 70 kDa protein cognate 4 | TTPSYVAFTDTER          | 1.40E-05 |  |  |  |
| Heat shock 70 kDa protein cognate 4 | MKETAEAYLGK            | 5.10E-05 |  |  |  |
| Heat shock 70 kDa protein cognate 4 | APAVGIDLGTTYSCVGVFQHGK | 2.00E-04 |  |  |  |
| Heat shock 70 kDa protein cognate 4 | VEIANDQGNR             | 0.0045   |  |  |  |
| Heat shock 70 kDa protein cognate 4 | ITITNDKGR              | 0.05     |  |  |  |
| Tubulin alpha-1 chain               | VGINYQPPTVVPGGDLAK     | 1.30E-04 |  |  |  |
| Tubulin alpha-1 chain               | DVNAAIATIK             | 0.019    |  |  |  |



## SUPPLEMENTAL REFERENCES

1. Nimonkar, A.V., Genschel, J., Kinoshita, E., Polaczek, P., Campbell, J.L., Wyman, C., Modrich, P. and Kowalczykowski, S.C. (2011) BLM-DNA2-RPA-MRN and EXO1-BLM-RPA-MRN constitute two DNA end resection machineries for human DNA break repair. *Genes Dev*, 25, 350-362.
2. Macris, M.A., Krejci, L., Bussen, W., Shimamoto, A. and Sung, P. (2006) Biochemical characterization of the RECQ4 protein, mutated in Rothmund-Thomson syndrome. *DNA repair*, 5, 172-180.
3. Mendoza, O., Bourdoncle, A., Boule, J.B., Brosh, R.M., Jr. and Mergny, J.L. (2016) G-quadruplexes and helicases. *Nucleic Acids Res*, 44, 1989-2006.
4. Keller, H., Kiosze, K., Sachsenweger, J., Haumann, S., Ohlenschlager, O., Nuutinen, T., Syvaoja, J.E., Grolach, M., Grosse, F. and Pospiech, H. (2014) The intrinsically disordered amino-terminal region of human RecQL4: multiple DNA-binding domains confer annealing, strand exchange and G4 DNA binding. *Nucleic Acids Res*, 42, 12614-12627.
5. Guy, C.P. and Bolt, E.L. (2005) Archaeal Hel308 helicase targets replication forks in vivo and in vitro and unwinds lagging strands. *Nucleic Acids Res*, 33, 3678-3690.
